# Supplementary material
Source: PubMed Central journal article supplement (PMC1761973)
Supplement: plntphys_pp.106.088609_5.pdf [file plntphys_pp.106.088609_5.pdf]

## Supplemental Figure Legends

**Figure S1. Intracellular metal content in response to manganese depletion.** Cells subject to serial transfer to Mn-deficient TAP medium were collected and total Mn (A) and Fe (B) content was measured by ICP-MS (See Methods).

**Figure S2. Selective sensitivity of Mn-deficient cells to peroxides.** Cells were grown in 0.1  $\mu\text{M}$  supplemental  $\text{Mn}^{2+}$  or 25  $\mu\text{M}$   $\text{Mn}^{2+}$  conditions for 2 d. Cultures were diluted to  $1 \times 10^6$  cells / mL before the addition of the indicated concentrations of hydrogen peroxide ( $\text{H}_2\text{O}_2$ ), cumene hydroperoxide, methyl viologen, *tert*-butyl hydroperoxide, Rose Bengal or metronidazole. Growth was monitored by counting cells in a hemocytometer.

**Figure S3. MnSOD is up-regulated by Fe-deficiency.** A, RNA were isolated from cells (strain CC1021) grown in 0.2  $\mu\text{M}$  or 20  $\mu\text{M}$  iron. Gene expression was assessed by real-time PCR as described in the legend to Fig. 5, except that the error bars represent the variation in technical triplicates of the PCR reactions.

**Figure S4. Time course of changes in gene expression in response to Mn-deficiency and re-supply.** RNA from cells subject to serial transfer to Mn-deficient TAP medium was analyzed (left column). The expression is presented relative to Mn-replete conditions.  $\text{MnCl}_2$  (25  $\mu\text{M}$ ) was added to Mn-deficient cultures and RNA was extracted from the cells at the indicated times and assayed for accumulation of specific mRNAs by real-time PCR (right column) as described in the legend to Fig. 5.
