# Supplementary material
Source: PubMed Central journal article supplement (PMC1761973)

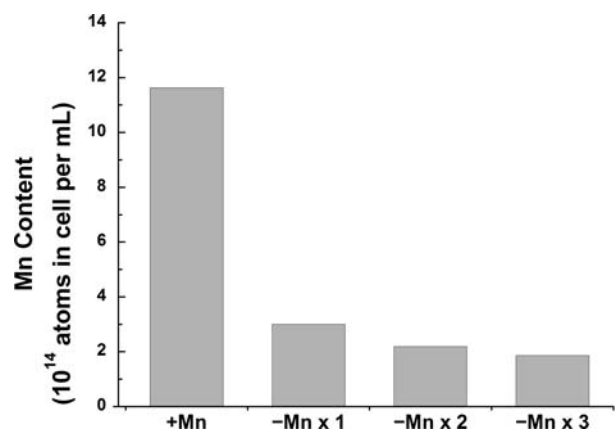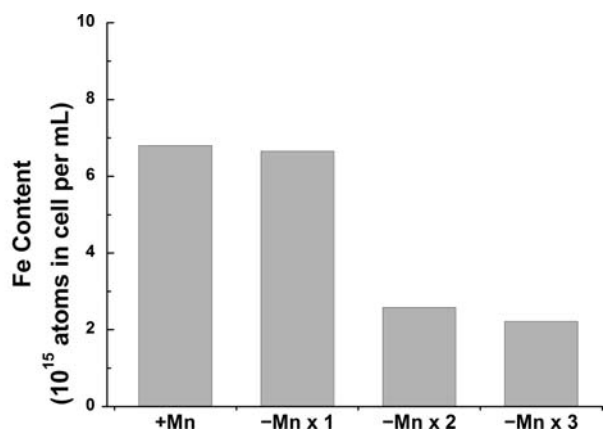

Supplement: plntphys_pp.106.088609_1.pdf [file plntphys_pp.106.088609_1.pdf]

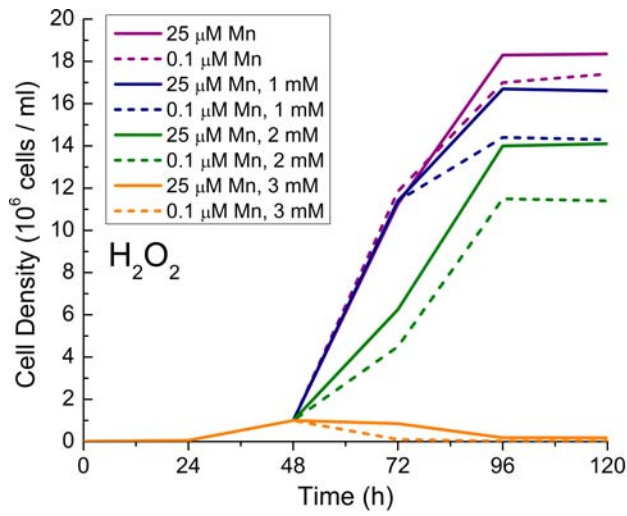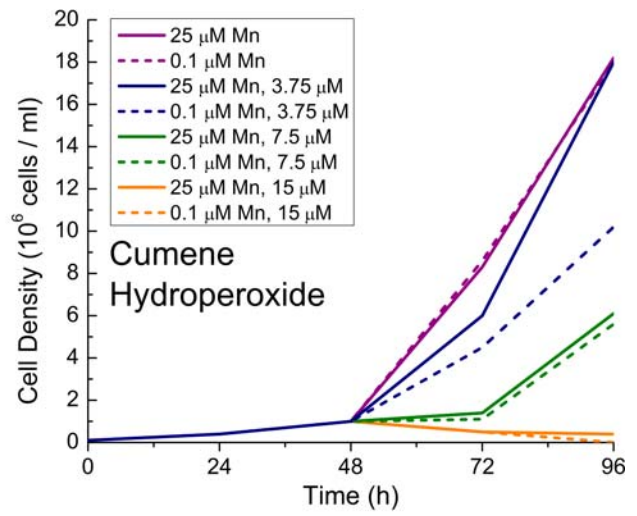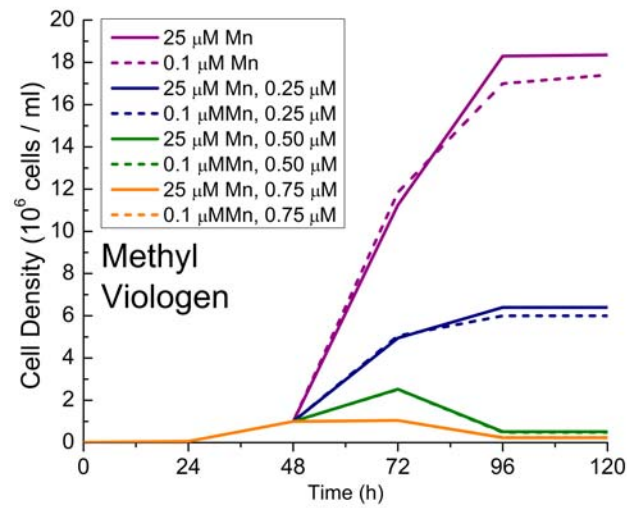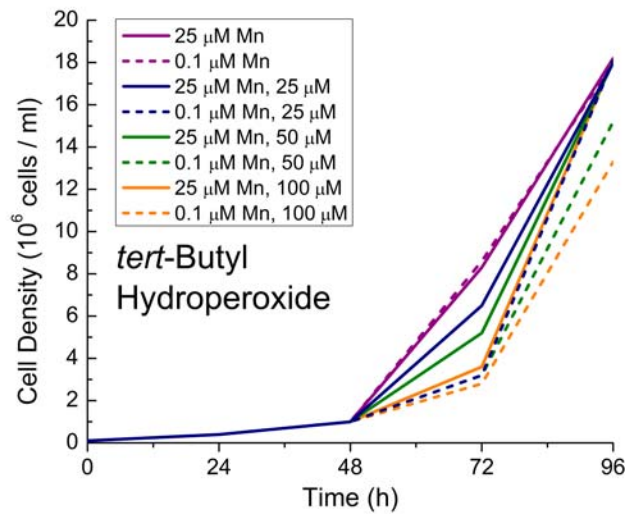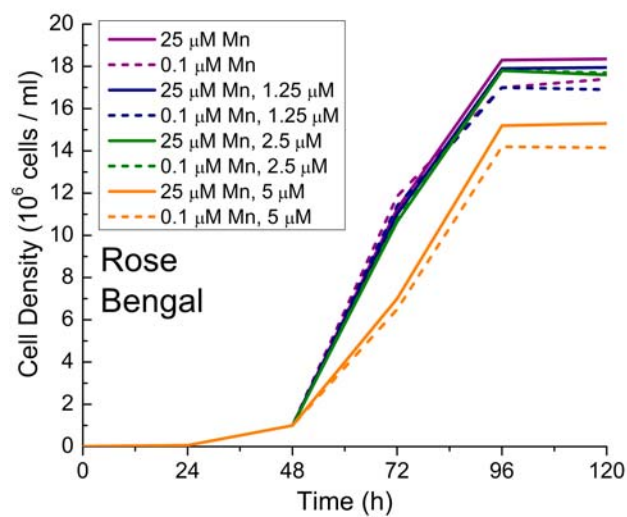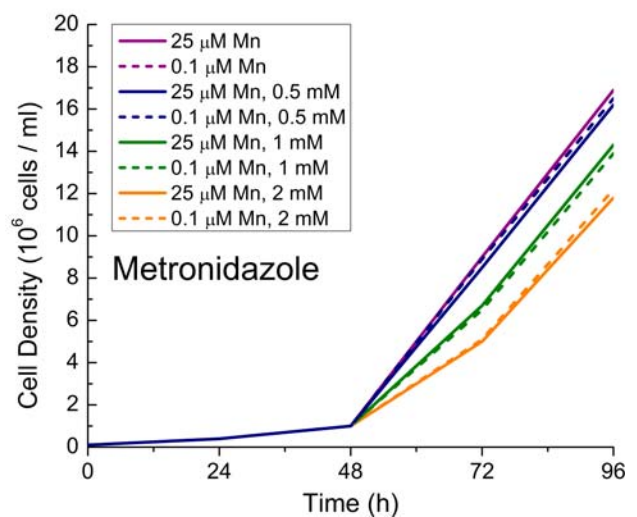

Supplement: plntphys_pp.106.088609_2.pdf [file plntphys_pp.106.088609_2.pdf]

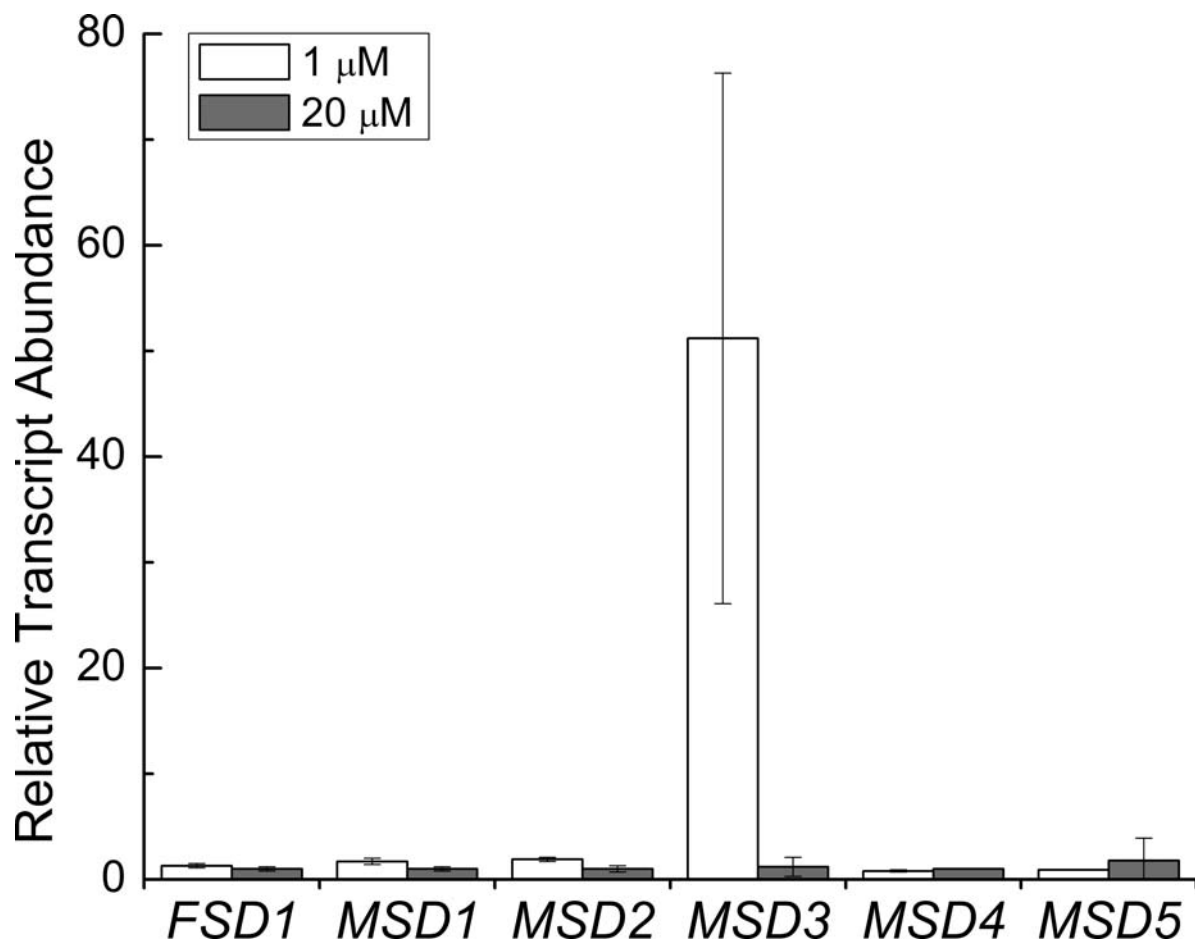

Supplement: plntphys_pp.106.088609_3.pdf [file plntphys_pp.106.088609_3.pdf]

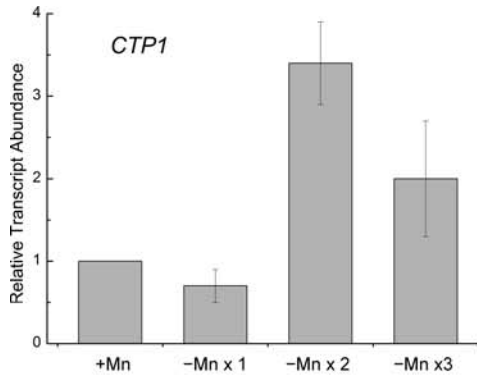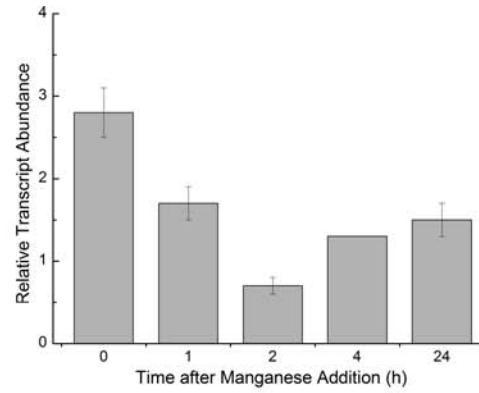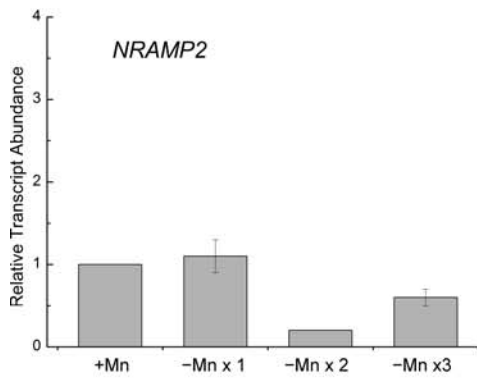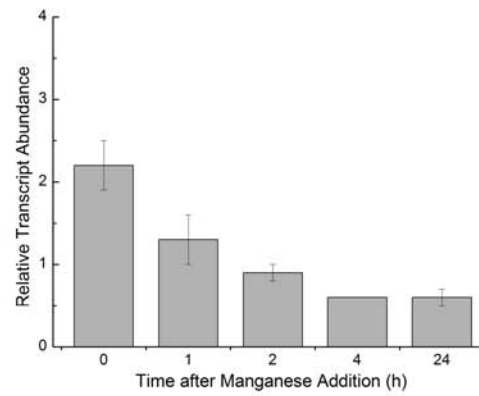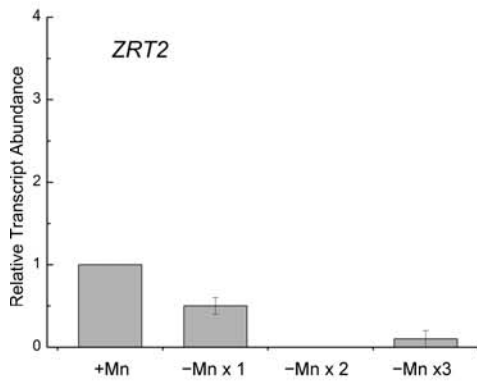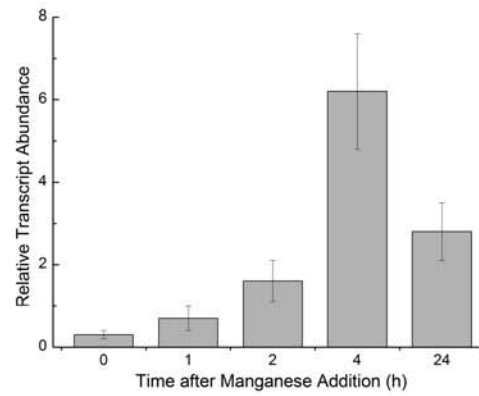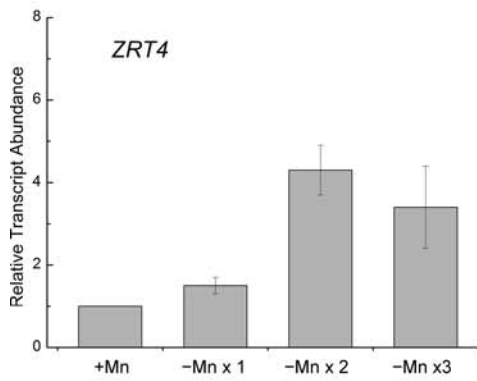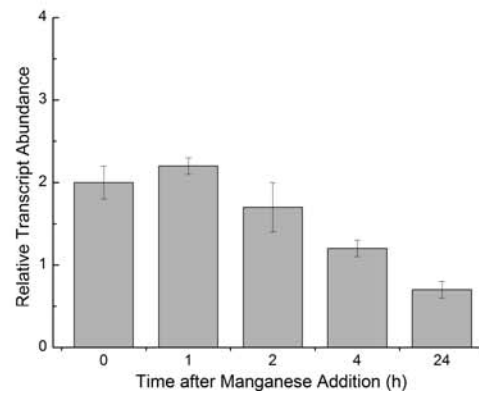

Supplement: plntphys_pp.106.088609_4.pdf [file plntphys_pp.106.088609_4.pdf]
